# Supplementary material
Source: PubMed Central journal article supplement (PMC2903436)

## ***Supporting Information***

### **Optimizing the Conditions of a Multiple Reaction Monitoring Assay for Membrane Proteins: Quantification of Cytochrome P450 11A1 and Adrenodoxin Reductase in Bovine Adrenal Cortex and Retina**

**Wei-Li Liao,<sup>†,§</sup> Gun-Young Heo,<sup>‡</sup> Nathan G. Dodder,<sup>§,1</sup> Irina A. Pikuleva,<sup>‡</sup> and Illarion V. Turko<sup>\*,†,§</sup>**

*Center for Advanced Research in Biotechnology, University of Maryland Biotechnology Institute, Rockville, Maryland 20850, Department of Ophthalmology and Visual Sciences, Case Western Reserve University, Cleveland, Ohio 44106, and Analytical Chemistry Division, National Institute of Standards and Technology, Gaithersburg, Maryland 20899*

#### **Part A. Expression and Purification of <sup>15</sup>N-CYP11A1 and <sup>15</sup>N-AdR.**

To obtain <sup>15</sup>N-labeled proteins, *Escherichia coli* cells GC5 were co-transformed with expression constructs for CYP11A1 and AdR and the Gro7 vector containing chaperones GroEL and GroES. Subsequent protein expression was according to Marley et al., *J. Biomol. NMR* **2001**, *20*, 71-71. Briefly, overnight cultures were diluted 100-fold with 3L of Terrific Broth medium and grown by shaking (250 rpm) at 37°C until O.D<sub>600</sub> reached 0.6. Cultures were then washed twice with M9 minimal salt solution containing 1 g/L of <sup>15</sup>NH<sub>4</sub>Cl as the sole nitrogen source and incubated in 3L of M9 minimal media containing 0.5 mM δ-aminolevulinic acid. Expression of <sup>15</sup>N-CYP11A1 and <sup>15</sup>N-AdR and chaperones was induced by 1 mM isopropyl β-D-thiogalactopyranoside and 0.18 g/ml L arabinose, respectively. Cell cultures containing <sup>15</sup>N-CYP11A1 were grown at 28°C for 72 hours at 210 rpm shaking, and those with <sup>15</sup>N-AdR were shaken at 150 rpm at 30°C for 30 hours. Expression of <sup>15</sup>N-CYP11A1 and <sup>15</sup>N-AdR was monitored by a reduced CO difference spectrum and SDS-PAGE, respectively.

Purification of <sup>15</sup>N-CYP11A1 was as follows. Spheroplasts were prepared by suspending cells in 100 mM potassium phosphate buffer (KP<sub>i</sub>), pH 7.2, containing 20% glycerol. The cell suspension was incubated with 0.5 mg/ml lysozyme for 30 min on ice and subjected to centrifugation at 3000 g for 20 min. The pellet was re-suspended in

100 mM  $\text{KPi}$ , pH 7.2, containing 20% glycerol and complete EDTA free protease inhibitor cocktail (Roche Diagnostics). DNase (0.5  $\mu\text{g/ml}$ ), sodium cholate (0.8%),  $\beta$ -mercaptoethanol (BME, 5 mM) were added, and spheroplasts were sonicated on ice using six 20 s pulses at 1 minutes intervals followed by a high speed centrifugation at 106000  $g$  for 60 min. The supernatant after ultracentrifugation was diluted 2-fold with 10 mM  $\text{KPi}$ , pH 7.2, containing 0.2% sodium cholate, 100 mM NaCl, and 20% glycerol and applied to DEAE-cellulose equilibrated 50 mM  $\text{KPi}$ , pH 7.2, containing 0.5% sodium cholate, 50 mM NaCl, and 20% glycerol. The flow through fraction was applied to Ni-agarose column equilibrated with 50 mM  $\text{KPi}$ , pH 7.2, containing 0.5% sodium cholate, 2 mM imidazole, 1 mM BME, and 20% glycerol. The column was washed with 5 column volumes of the equilibration buffer, and then with 5 column volumes of the equilibration buffer containing 10 mM imidazole.  $^{15}\text{N}$ -CYP11A1 was eluted from the column with the equilibration buffer containing 300 mM imidazole. The P450 was diluted 5-fold with 10 mM  $\text{KPi}$ , pH 7.2, containing 0.3% sodium cholate, 1 mM EDTA, and 20% glycerol and applied to hydroxyapatite column equilibrated with the same buffer. The column was washed with 10 column volumes of the equilibration buffer followed by elution of  $^{15}\text{N}$ -CYP11A1 with the same buffer containing 400 mM  $\text{KPi}$ , pH 7.2.

To purify  $^{15}\text{N}$ -AdR, spheroplasts were prepared and treated as described above for  $^{15}\text{N}$ -CYP11A1. The supernatant after high speed centrifugation was applied to DEAE-cellulose equilibrated with 10 mM  $\text{KPi}$ , pH 7.2, and the flow through fraction was then applied to adrenodoxin-Sepharose column equilibrated with 10 mM  $\text{KPi}$ , pH 7.2. The column was washed with 10 column volumes of the equilibration buffer, and  $^{15}\text{N}$ -AdR was eluted with 50 mM  $\text{KPi}$ , pH 7.2, containing 0.1 mM EDTA, 1 M NaCl, and 20% glycerol. The protein was dialyzed against 50 mM  $\text{KPi}$ , pH 7.2, 0.1 mM EDTA, and 20% glycerol and applied to 2',5'-ADP-Sepharose column equilibrated with the same buffer. The column was washed with 10 column volumes of the equilibration buffer, and  $^{15}\text{N}$ -AdR was eluted with 50 mM  $\text{KPi}$ , pH 7.2, containing 0.1 mM EDTA, 0.3 M NaCl, 1 mM adenosine, and 20% glycerol.

## **Part B. OrgMassSpecR**

The OrgMassSpecR (Organic Mass Spectrometry with R) software program is an extension to the R programming language (<http://www.r-project.org/>). OrgMassSpecR was used to calculate the theoretical isotopic distributions of the  $^{15}\text{N}$ -labeled peptides, and the theoretical precursor ion and product ion  $m/z$  values of the labeled and unlabeled peptides during the selection of the MRM transitions. The homepage for OrgMassSpecR (<http://orgmassspecr.r-forge.r-project.org/>) gives instructions for getting started (it assumes R is installed). The source code is also available through the

homepage. The theoretical isotopic distributions were determined using the `IsotopicDistributionN` function. For example the command,

```
IsotopicDistributionN("NFIPLLNPVSQDFVSL LHK", incorp = 0.90)
```

produces the isotopic distribution of the given peptide with 90%  $^{15}\text{N}$  incorporation. The `Digest` function was used to determine theoretical tryptic peptides of the target proteins. The `FragmentPeptide` function was used to determine the b- and y-ions of selected peptides. The `OrgMassSpecR` help files contain usage information and examples for each function.

### Part C. Extracted Ion Chromatograms (A-C) and MRM Spectra (D-F).

Data are shown for peptides NFIPLLNPVSQDFVSLHK and YTEIFYQDLR from CYP11A1 and for peptides TATEKPGVEEAAR and SPQQVLPSPDGR from AdR. Transitions in the overlaid extracted ion chromatograms and the MRM/MS spectra have matching colors.

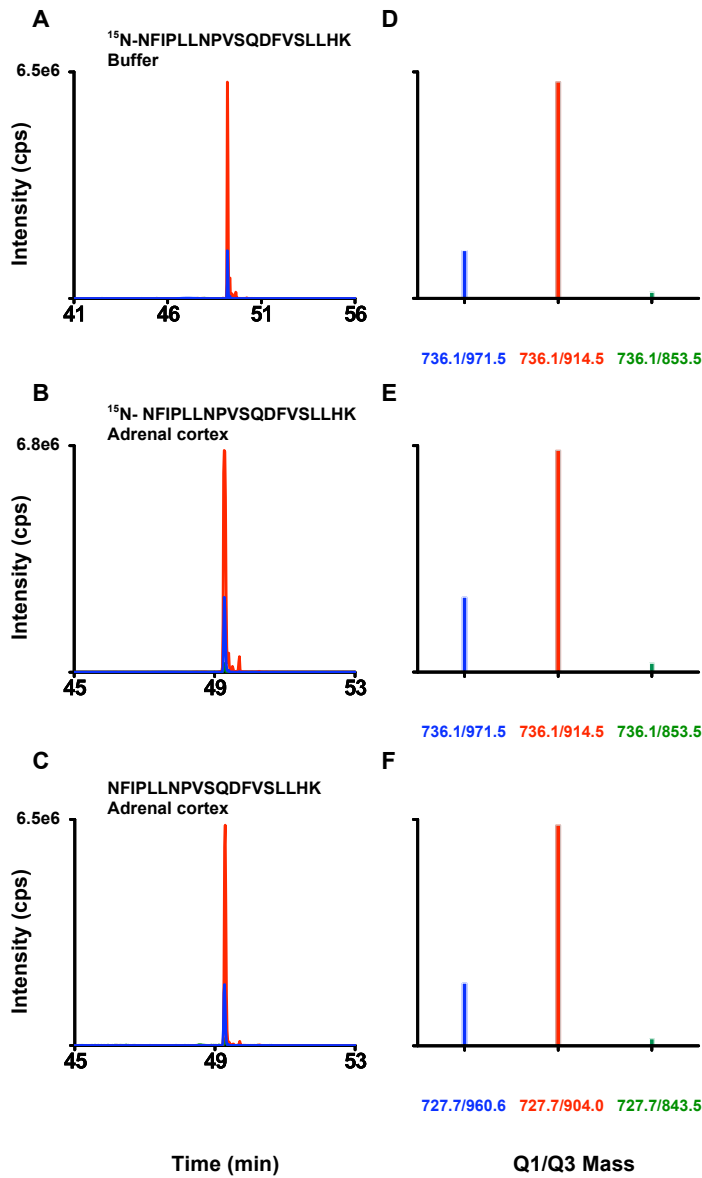

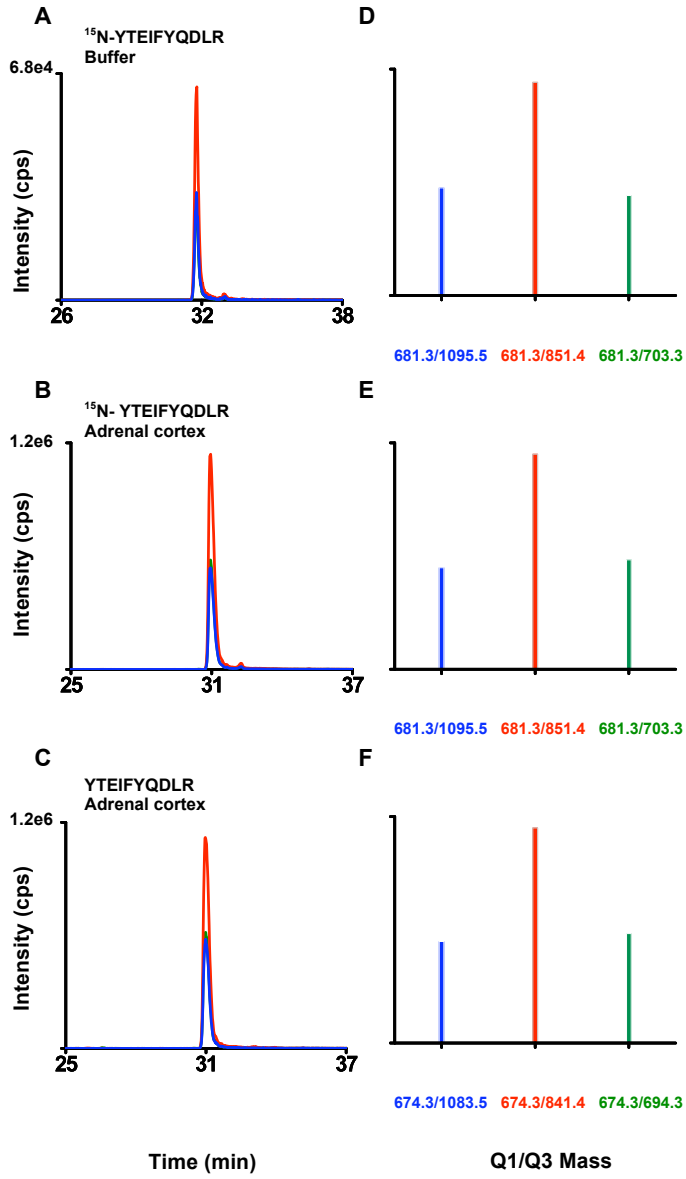

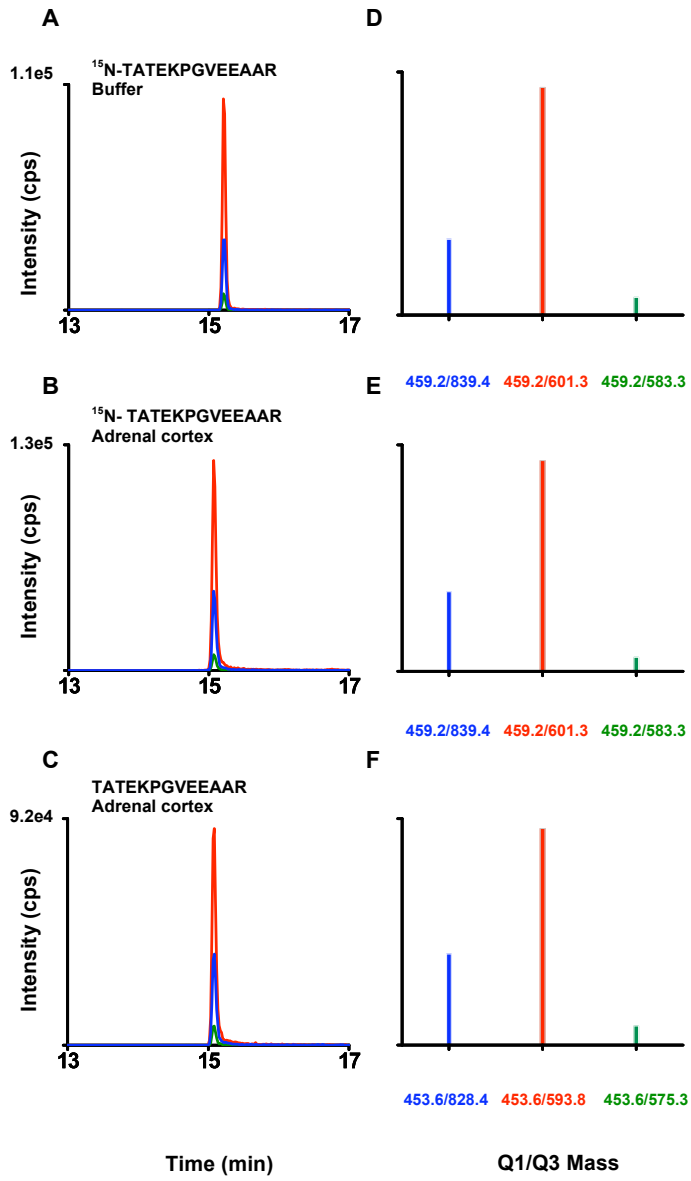

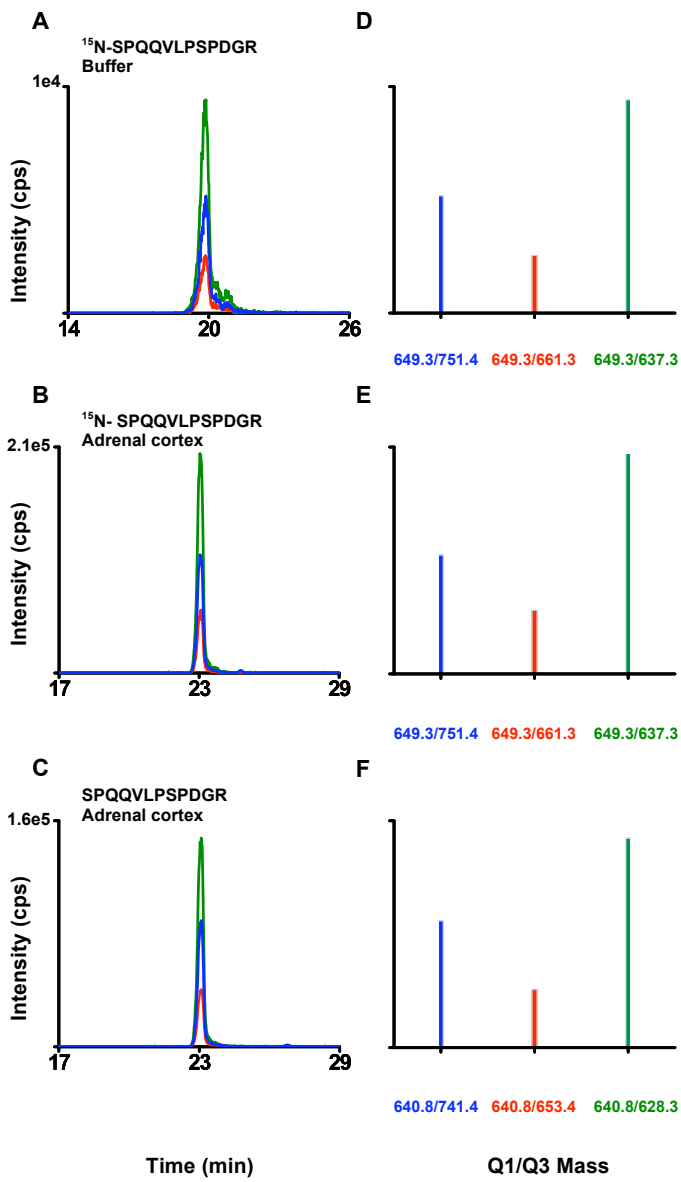

Supplement: NIHMS212410-supplement-supplement_1.pdf [file NIHMS212410-supplement-supplement_1.pdf]
